# Supplementary material for: Effects of lipid-lowering treatment intensity and adherence on cardiovascular outcomes in patients with a recent myocardial infarction: a Swedish register-based study
Source: Ups J Med Sci. 2022 May 4;127:10.48101/ujms.v127.8296. doi: 10.48101/ujms.v127.8296 (PMC9171571; doi:10.48101/ujms.v127.8296)

**Supplementary Data – Svensson et al.**

**Effects of lipid-lowering treatment intensity and adherence on  
cardiovascular outcomes in patients with a recent myocardial infarction: a  
Swedish register-based study**

## Supplementary tables

**Table S1** Definition of low, moderate, and high-intensity LLT\*

| LDL-C     |           |                                                                                                                                             |
|-----------|-----------|---------------------------------------------------------------------------------------------------------------------------------------------|
| Intensity | reduction | Regimens                                                                                                                                    |
| Low       | <30%      | Fluvastatin 20 or 40 mg; pravastatin 5, 10, or 20 mg; simvastatin 10 mg                                                                     |
| Moderate  | 30–49%    | Fluvastatin 80 mg; simvastatin 20 or 40 mg; atorvastatin 10 or 20 mg;<br>pravastatin 40 or 80 mg; lovastatin 40 mg; rosuvastatin 5 or 10 mg |
| High      | ≥50%      | Atorvastatin 40 or 80 mg; rosuvastatin 20 or 40 mg; simvastatin 80 mg                                                                       |

\*Based on the American College of Cardiology/American Heart Association (ACC/AHA) guidelines for cholesterol treatment (Stone NJ, et al. Circulation 2014;129:S1–45). LDL-C, low-density lipoprotein cholesterol; LLT, lipid-lowering therapy.

**Table S2** Percentage reduction in LDL-C by drug type and dose

| LLT                              | Dose (mg/day) |    |    |    |    |
|----------------------------------|---------------|----|----|----|----|
|                                  | 5             | 10 | 20 | 40 | 80 |
| Fluvastatin (1)                  | –             | –  | 21 | 27 | 33 |
| Pravastatin (1)                  | –             | 20 | 24 | 29 | –  |
| Simvastatin (1)                  | –             | 27 | 32 | 37 | 42 |
| Atorvastatin (1)                 | –             | 37 | 43 | 49 | 55 |
| Rosuvastatin (1)                 | 38            | 43 | 48 | 53 | –  |
| Ezetimibe monotherapy (2,3)      | –             | 19 | –  | –  | –  |
| Ezetimibe added to statin* (3,4) | –             | 24 | –  | –  | –  |

\*Incremental 24% LDL-C reduction calculated after the statin reduction is approximately the same as an additional ~10–15% reduction from pre-treatment LDL-C. For example, the expected reduction in LDL-C with atorvastatin 20 mg is 43%, and the additional reduction with ezetimibe is 14% (i.e. 24% of 57%), leading to a total LDL-C reduction of 57%. The expected reduction with atorvastatin 80 mg is 55%, and the additional reduction with ezetimibe is 11% (i.e. 24% of 45%), leading to a total reduction of 66%. LDL-C, low-density lipoprotein cholesterol; LLT, lipid-lowering therapy.

## References

1. National Institute for Health and Care Excellence (NICE). Cardiovascular disease: risk assessment and reduction, including lipid modification. Clinical guideline [CG181]. 2014. Available from: <https://www.nice.org.uk/guidance/cg181>
2. Pandor A, Ara RM, Tumur I, Wilkinson AJ, Paisley S, Duenas A, et al. Ezetimibe monotherapy for cholesterol lowering in 2,722 people: systematic review and meta-analysis of randomized controlled trials. *J Intern Med*. 2009;265:568-580. doi: 10.1111/j.1365-2796.2008.02062.x
3. Ara R, Tumur I, Pandor A, Duenas A, Williams R, Wilkinson A, et al. Ezetimibe for the treatment of hypercholesterolaemia: a systematic review and economic evaluation. *Health Technol Assess*. 2008;12:iii, xi-xiii, 1-212. doi: 10.3310/hta12210
4. Cannon CP, Blazing MA, Giugliano RP, McCagg A, White JA, Theroux P, et al. Ezetimibe Added to Statin Therapy after Acute Coronary Syndromes. *N Engl J Med*. 2015;372:2387-2397. doi: 10.1056/NEJMoa1410489

**Table S3** Distribution of MACE during follow-up

|                                           | <b>Overall</b>           | <b>2010–2013</b>         | <b>2014–2016</b>         |
|-------------------------------------------|--------------------------|--------------------------|--------------------------|
|                                           | <b>cohort</b>            | <b>subgroup</b>          | <b>subgroup</b>          |
|                                           | <b><i>n</i> = 50,298</b> | <b><i>n</i> = 29,251</b> | <b><i>n</i> = 21,047</b> |
| MACE, n                                   | 6,922                    | 5,262                    | 1,660                    |
| Hospitalization for MI (non-fatal), n (%) | 3,289 (48)               | 2,444 (46)               | 845 (51)                 |
| Hospitalization for IS (non-fatal), n (%) | 1,292 (19)               | 1,021 (19)               | 271 (16)                 |
| CV death, n (%)                           | 2,341 (34)               | 1,797 (34)               | 544 (33)                 |

CV, cardiovascular; IS, ischemic stroke; MACE, major adverse cardiovascular events; MI, myocardial infarction.

**Table S4** Multivariable Cox regression analysis of association between intensity, adherence, and the combined measure of treatment intensity and adherence, and MACE

| Variable                                     | Overall cohort     | 2010–2013 subgroup | 2014–2016 subgroup |
|----------------------------------------------|--------------------|--------------------|--------------------|
| 10% increase in intensity                    | 1.06 (1.02–1.11)** | 1.10 (1.05–1.16)** | 1.03 (0.94–1.13)   |
| 10% increase in adherence                    | 1.06 (1.03–1.10)** | 1.03 (0.99–1.07)   | 1.07 (0.99–1.14)   |
| 10% increase in combined intensity-adherence | 0.71 (0.65–0.77)** | 0.74 (0.67–0.81)** | 0.77 (0.65–0.90)** |

Values are expressed as HR (95% CI). Models adjusted for the following covariates: initial use of high-intensity LLT; sex; hypertension; CKD stages 4–5; diabetes; Charlson comorbidity index; atrial fibrillation; year of follow-up. Additionally, the models use age as the time scale to control for age. The model incorporates stratification variables rather than covariates as necessary to handle issues related to non-proportionality of hazards. Length of follow-up was limited to 4 years to handle non-proportional hazards.

\*\*P < 0.01; \*P < 0.05; CI, confidence interval; CKD, chronic kidney disease; HR, hazard ratio; LLT, lipid-lowering therapy; MACE, major cardiovascular events

**Table S5** Multivariable Cox regression analysis of association between intensity and adherence, and MACE

| Variable                  | Overall cohort     | 2010–2013 subgroup | 2014–2016 subgroup |
|---------------------------|--------------------|--------------------|--------------------|
| 10% increase in intensity | 0.98 (0.94–1.02)   | 1.01 (0.97–1.06)   | 0.95 (0.88–1.03)   |
| 10% increase in adherence | 0.94 (0.93–0.96)** | 0.93 (0.92–0.95)** | 0.96 (0.93–0.99)** |

Values are expressed as HR (95% CI). Models adjusted for the following covariates: initial use of high-intensity LLT; sex; hypertension; CKD stages 4–5; diabetes; Charlson comorbidity index; atrial fibrillation; year of follow-up. Additionally, the models use age as the time scale to control for age. The model incorporates stratification variables rather than covariates as necessary to handle issues related to non-proportionality of hazards. Length of follow-up was limited to 4 years to handle non-proportional hazards.

\*\*P < 0.01; \*P < 0.05; CI, confidence interval; CKD, chronic kidney disease; HR, hazard ratio; LLT, lipid-lowering therapy; MACE, major cardiovascular events

**Table S6:** Baseline characteristics by initial use of statin intensity

|                                          | <b>Low-intensity statins</b> | <b>Moderate-intensity statins</b> | <b>High-intensity statins</b> |
|------------------------------------------|------------------------------|-----------------------------------|-------------------------------|
|                                          | <b><i>n</i> = 170</b>        | <b><i>n</i> = 21,543</b>          | <b><i>n</i> = 28,475</b>      |
| Duration of follow-up (years), mean (SD) | 4.5 (2.5)                    | 5.5 (2.17)                        | 3.6 (1.5)                     |
| Age (years), mean (SD)                   | 77.0 (13.7)                  | 69.5 (12.6)                       | 66.7 (11.8)                   |
| Charlson comorbidity index, n (%)        |                              |                                   |                               |
| 1                                        | 83 (48.9)                    | 14,048 (65.2)                     | 20,387 (71.6)                 |
| 2+                                       | 87 (51.2)                    | 7,495 (34.8)                      | 8,088 (28.4)                  |

## Supplementary figures

**Figure S1** Predicted cardiovascular risk reduction using the combined measure of treatment intensity and adherence for a) the 2010–2013 and b) 2014–2016 subgroups

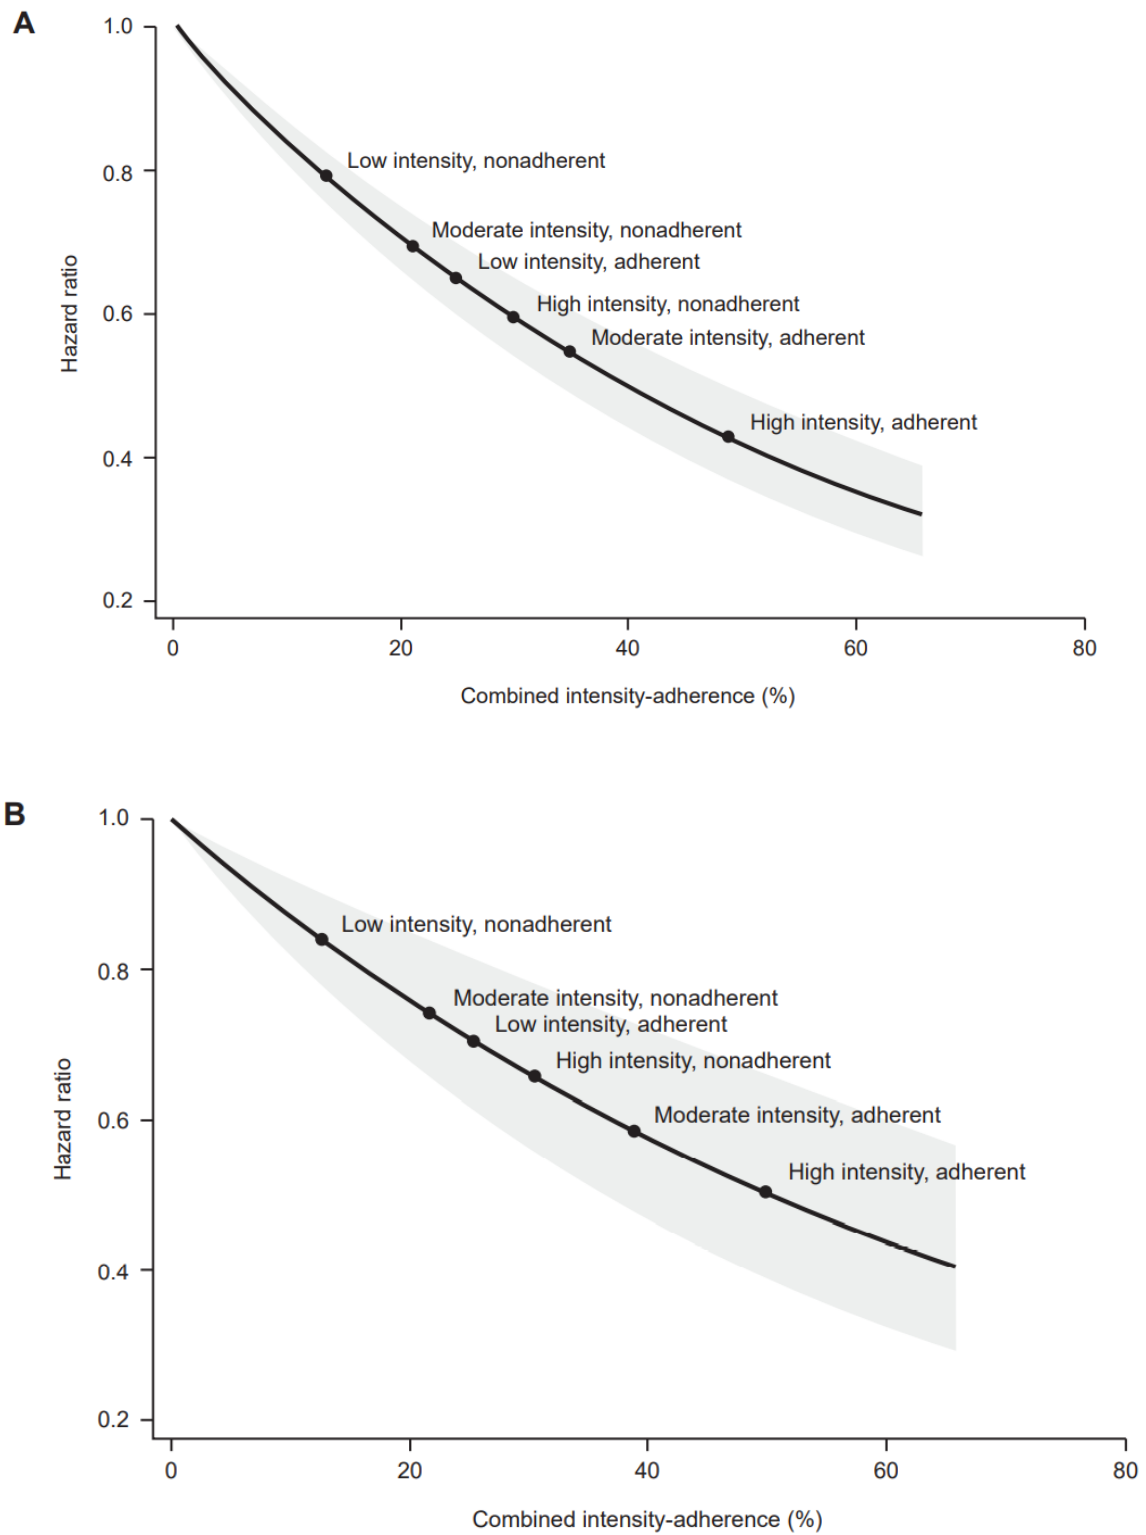

Supplement: Effects of lipid-lowering treatment intensity and adherence on cardiovascular outcomes in patients with a recent myocardial infarction: a Swedish register-based study [file UJMS-127-8296-s001.pdf]
